# Supplementary material
Source: publisher figshare collection journal article supplement (https://tandf.figshare.com/articles/dataset/_/4789084)
Supplement: Supplementary file 1 [file 2]

Archive with 3 entries (3 files):
- tost_a_1259185_sm2474.pdf
- tost_a_1259185_sm6128.pdf
- tost_a_1259185_sm2801.pdf
