# Supplementary material
Source: publisher figshare collection journal article supplement (https://tandf.figshare.com/articles/dataset/_/4789084)
Supplement: Supplementary file 1 [file 2 › tost_a_1259185_sm6128.pdf]

## Supplementary Information

**Gender related morphometric differences in mature and nestling Crowned Eagles, with comments on ringing of eagle nestlings in KwaZulu-Natal, South Africa**

Shane C McPherson, Mark Brown and Colleen T Downs

Ostrich 2017. DOI: 10.2989/00306525.2016.1259185

**Figure S1:** Hind claw length of a Crowned Eagle measured with electronic callipers

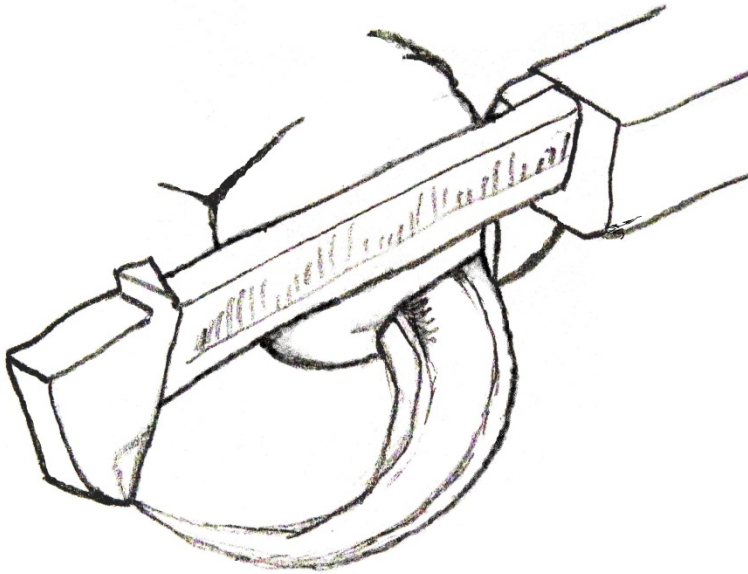

**Figure S2:** Blood-spot sample from the first toe of Crowned Eagle pulli in this study. Photo credits; Esmarella Bourret 2013, Jacques Sellschop 2013.

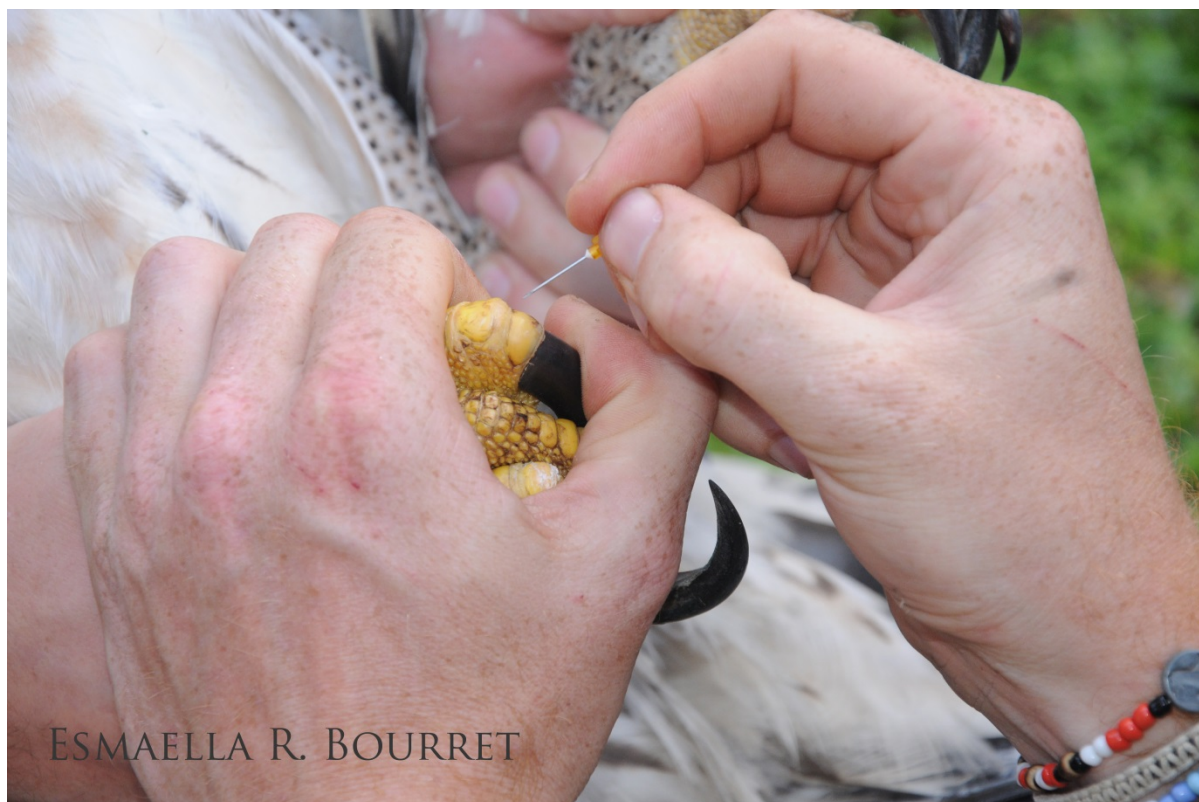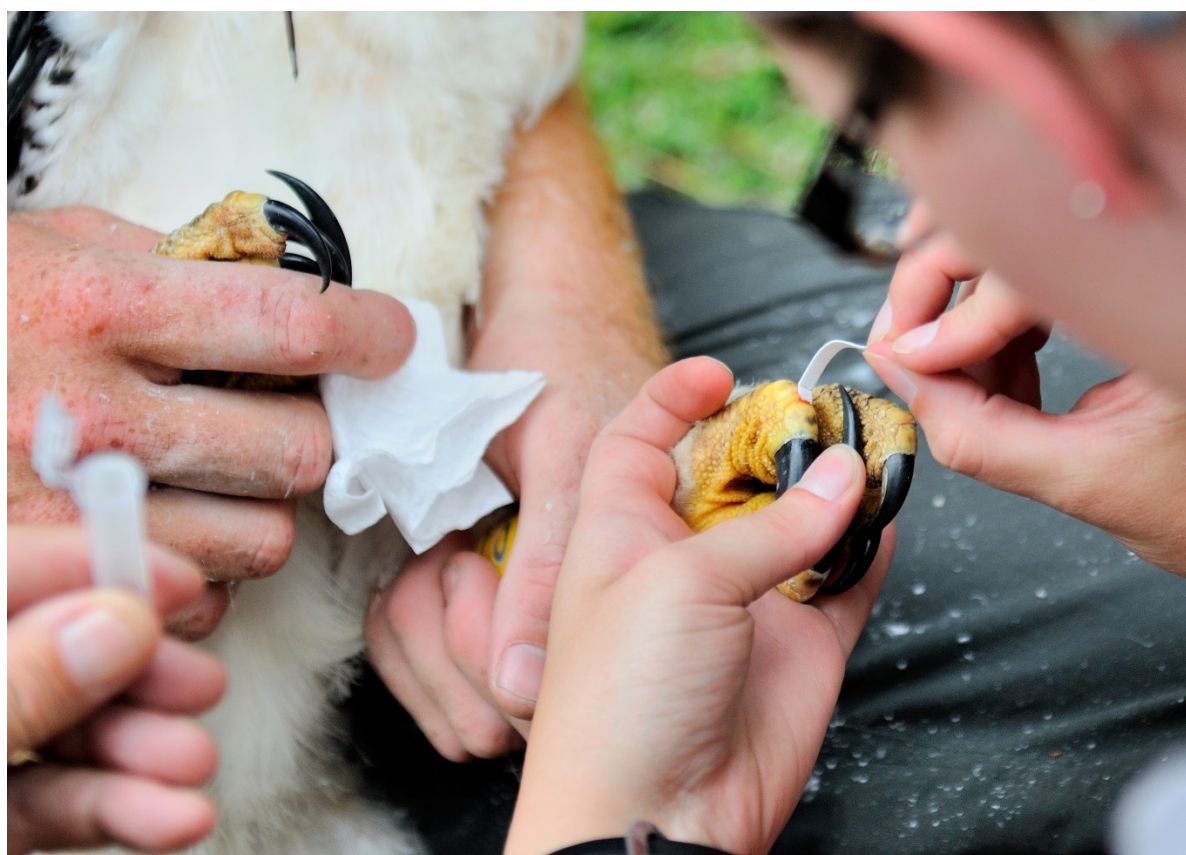

**Figure S3:** Growth sequences of known-age Crowned Eagle pulli, one male E4 and one female C3

Male “E4” hatched 8 October 2012. Camera install on the 29 Oct 2012 when E4 was 21 days of age.

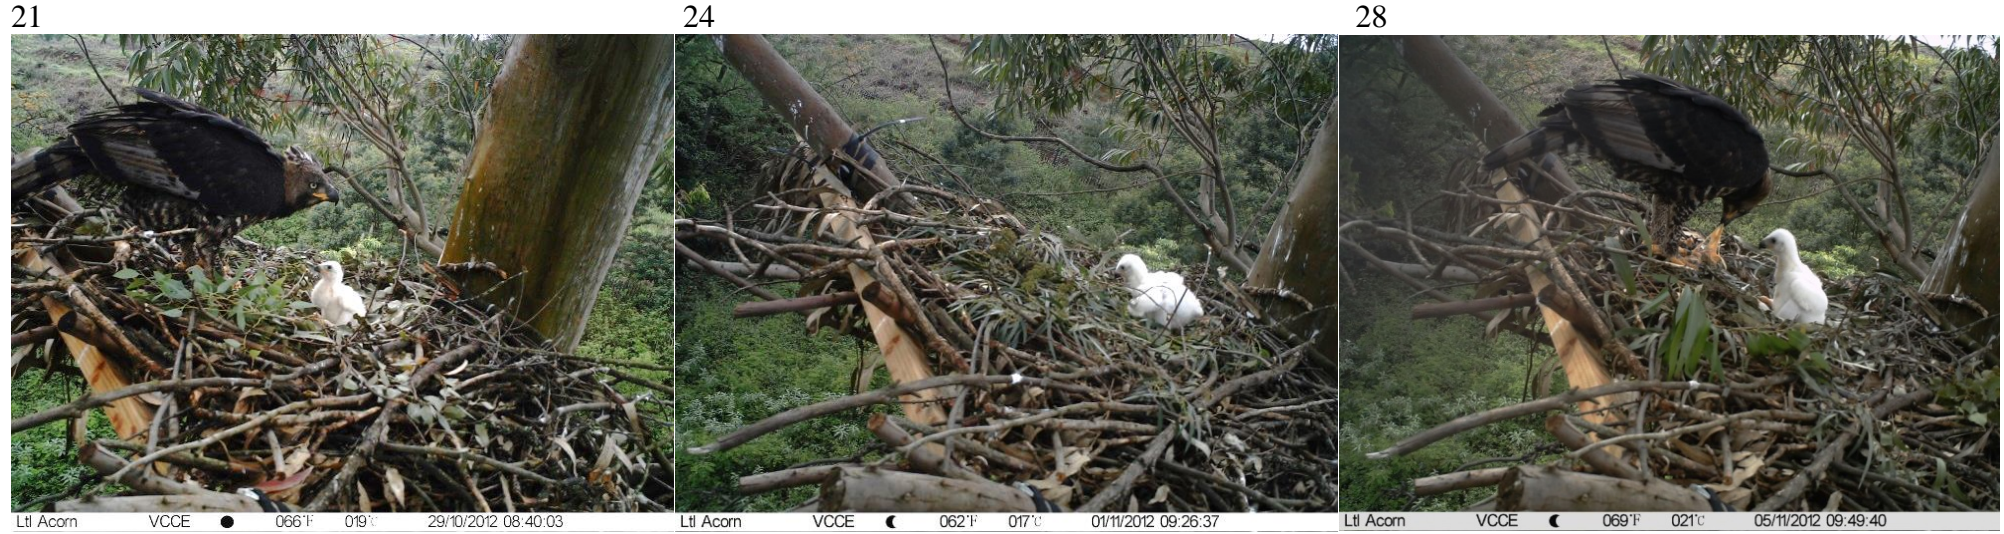

Female “C3” hatched 18 September 2013. Camera installed 25 September 2013 when C3 was 7 days of age.

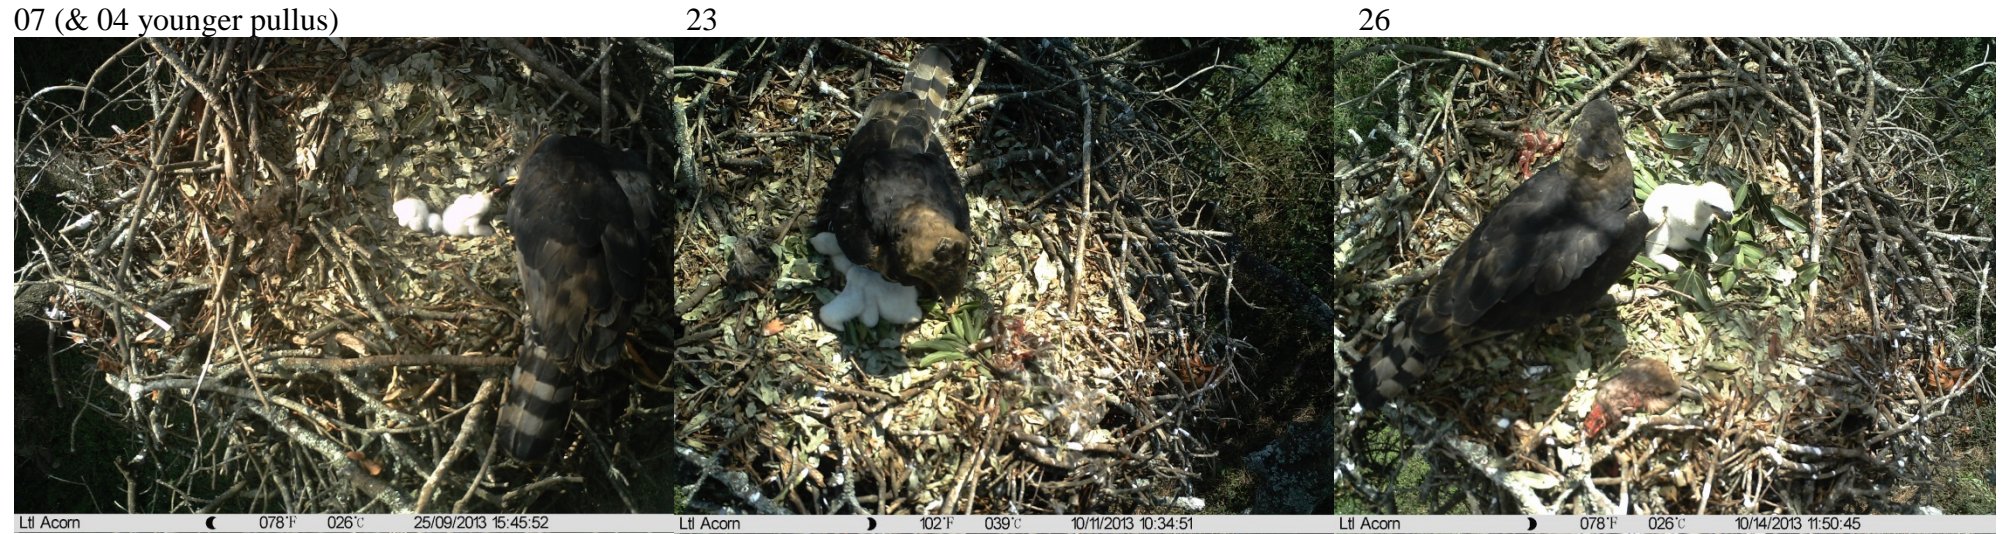

Male E4  
32

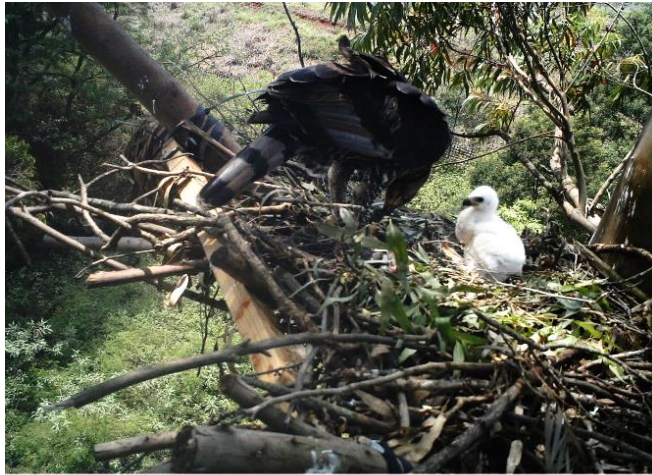

Ltl Acorn VCCE ◀ 077°F 025°C 09/11/2012 11:00:32

36

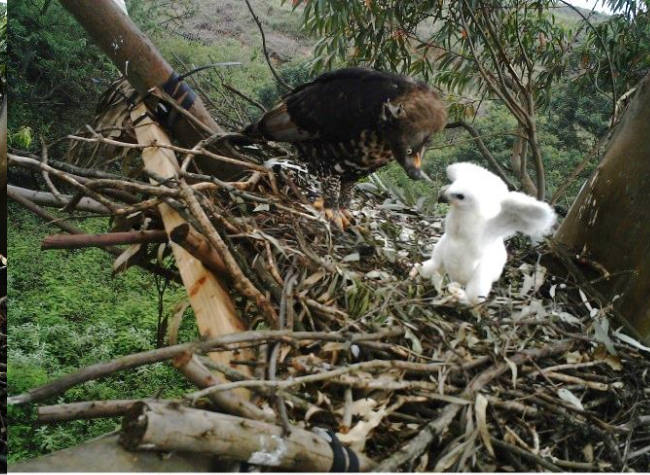

Ltl Acorn VCCE ○ 066°F 019°C 13/11/2012 09:09:55

40

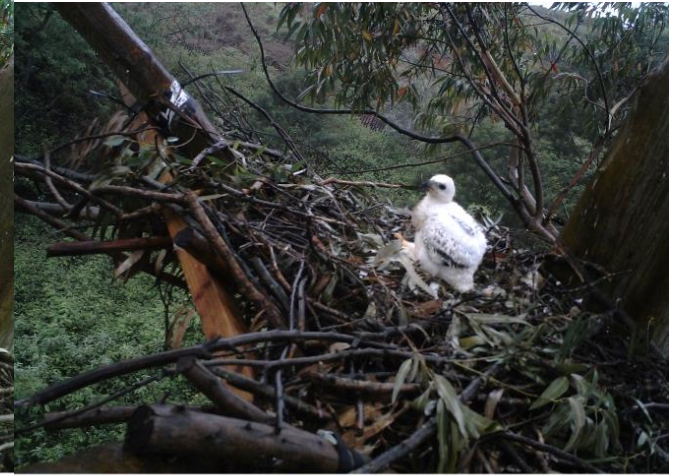

Ltl Acorn VCCE ▶ 062°F 017°C 17/11/2012 16:42:57

Female C3  
32

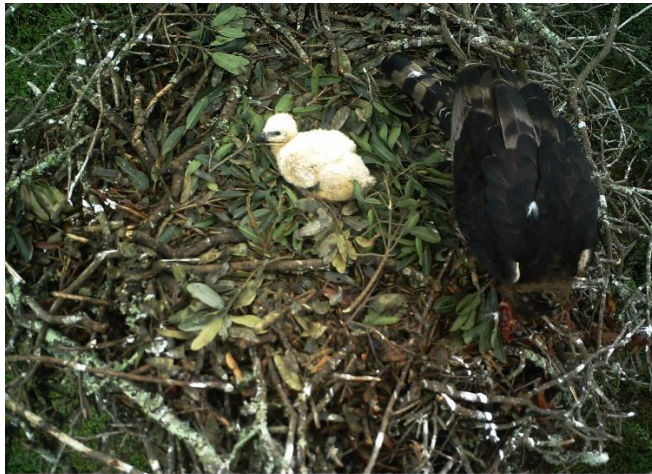

Ltl Acorn ◀ 062°F 017°C 10/20/2013 08:51:29

36

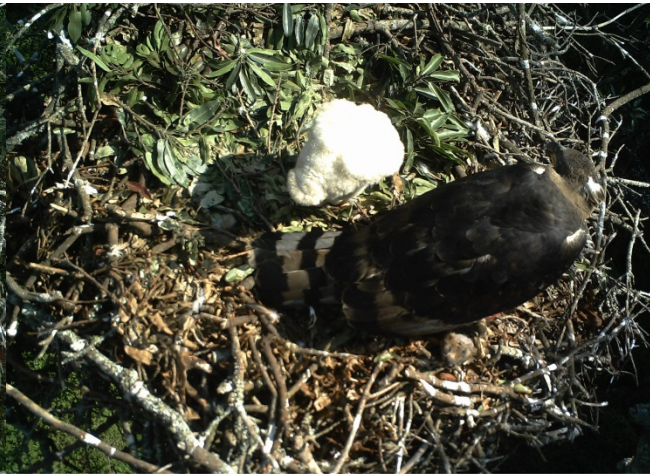

Ltl Acorn ◀ 069°F 021°C 10/24/2013 08:53:49

43

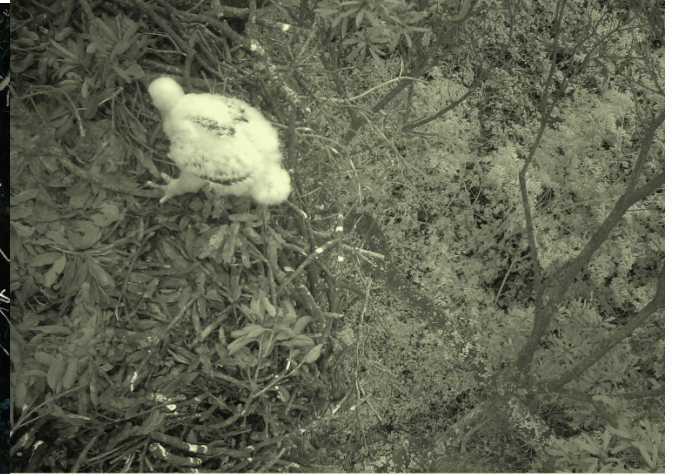

Ltl Acorn ○ 071°F 022°C 10/31/2013 08:46:04

Male E4  
44

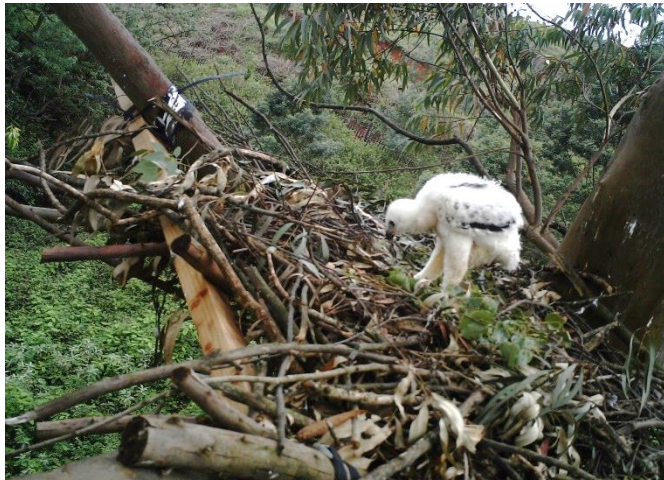

Ltl Acorn VCCE 069°F 021°C 21/11/2012 13:04:31

47

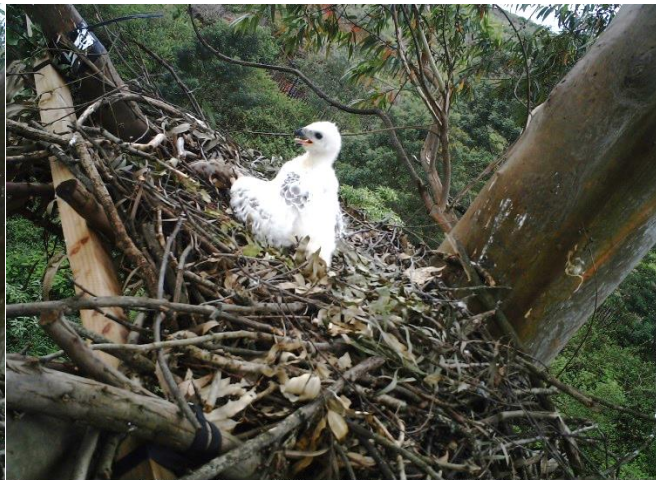

Ltl Acorn VCCE 091°F 033°C 24/11/2012 15:45:08

51

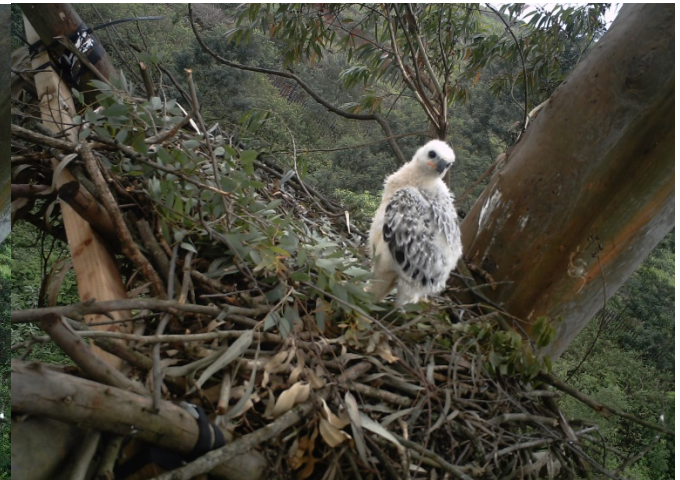

Ltl Acorn VCCE 066°F 019°C 28/11/2012 09:44:27

Female C3  
44

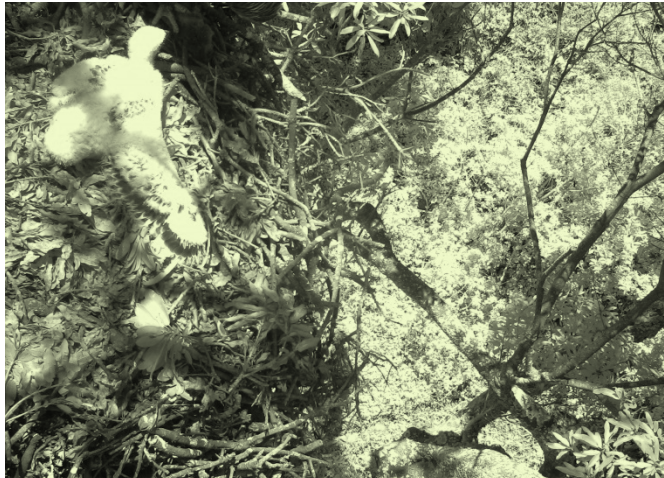

Ltl Acorn 082°F 028°C 11/01/2013 13:32:21

47

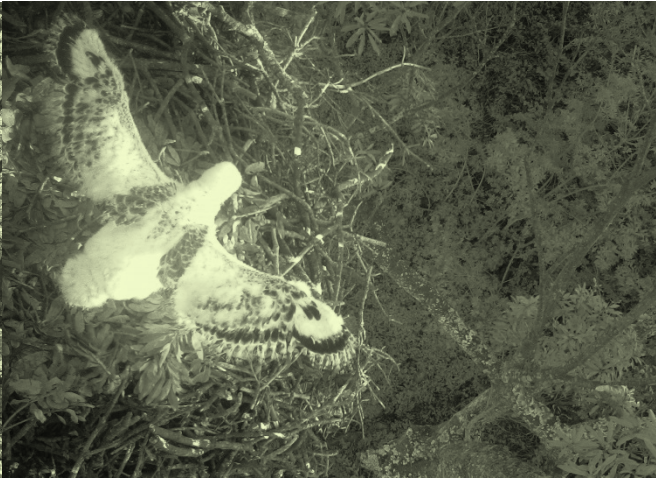

Ltl Acorn 059°F 015°C 11/04/2013 05:39:41

51

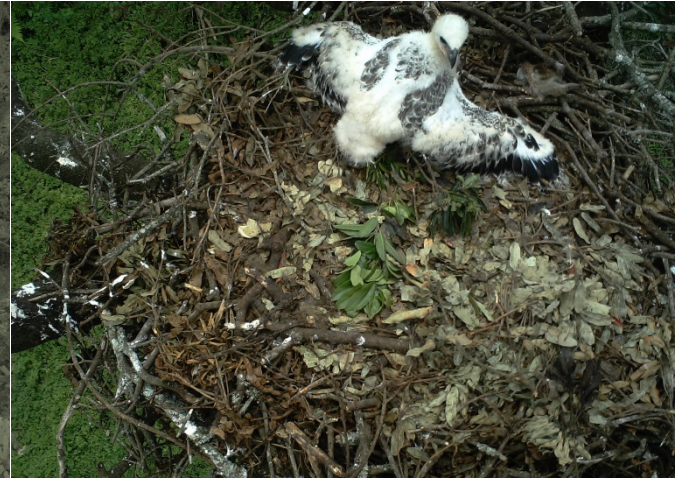

Ltl Acorn 080°F 027°C 11/08/2013 11:48:05

Male E4  
54

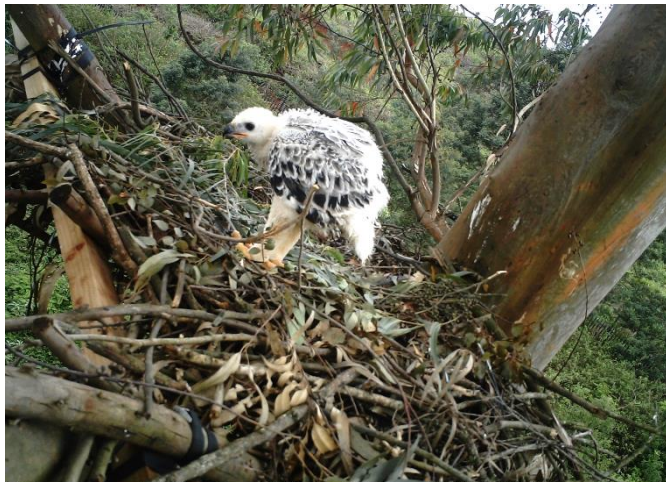

Ltl Acorn VCCE 073°F 023°C 01/12/2012 11:26:55

59

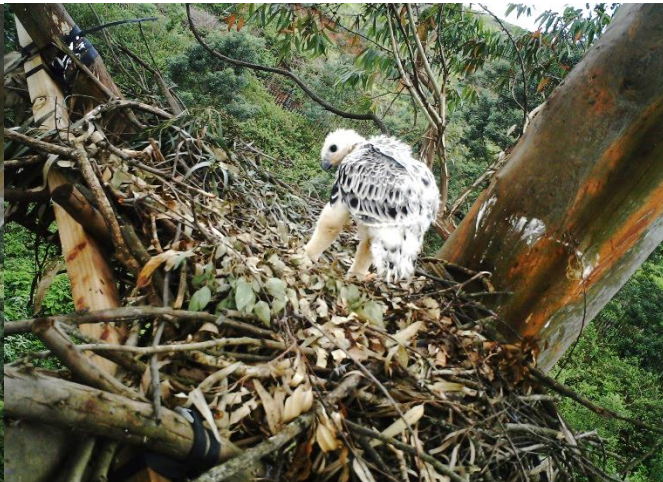

Ltl Acorn VCCE 082°F 028°C 06/12/2012 14:57:13

64

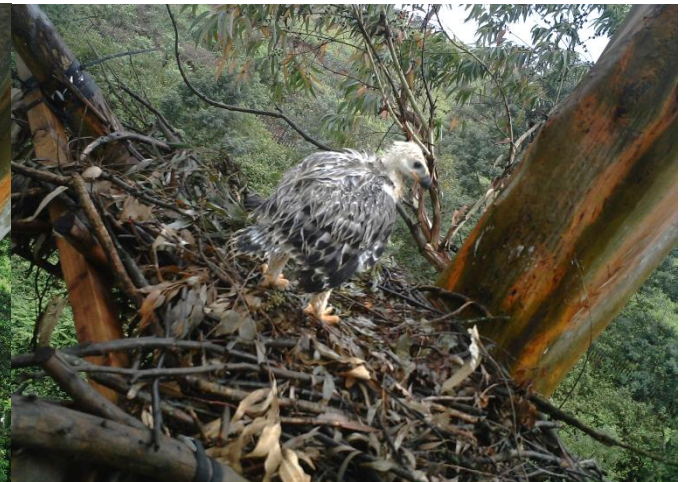

Ltl Acorn VCCE 062°F 017°C 11/12/2012 11:12:38

Female C3  
56

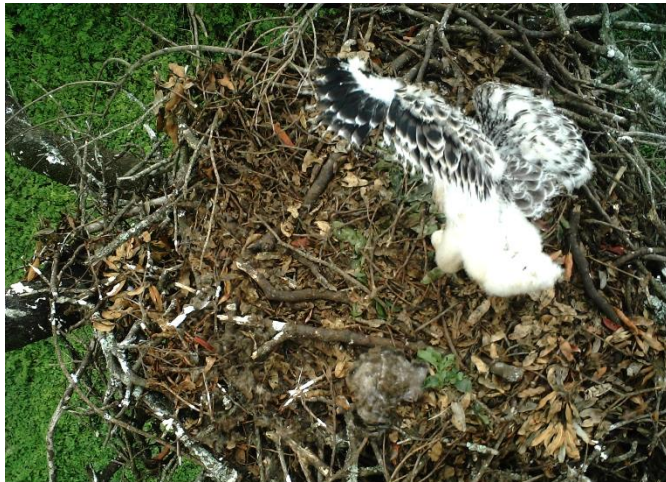

Ltl Acorn 082°F 028°C 11/13/2013 15:55:21

63

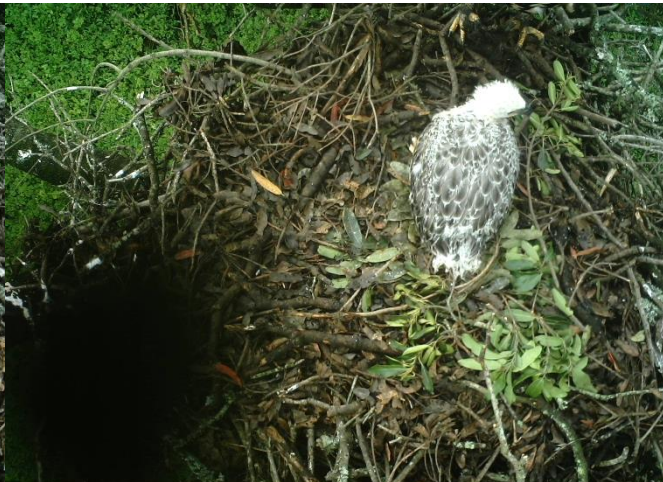

Ltl Acorn 075°F 024°C 11/20/2013 06:26:17

67

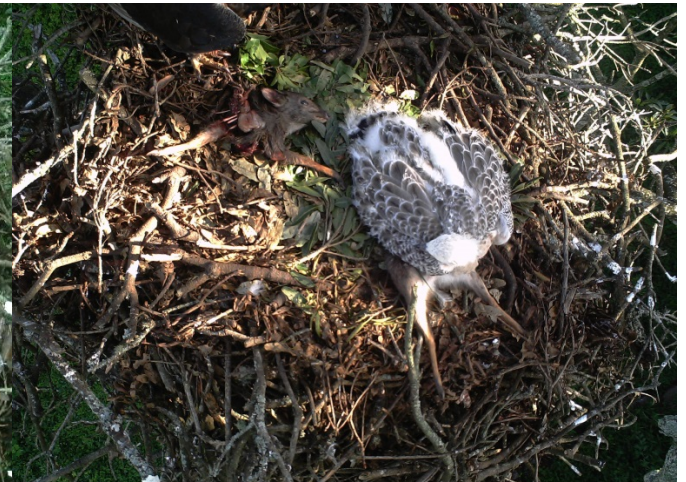

Ltl Acorn 068°F 020°C 11/24/2013 07:33:42

Male E4  
66

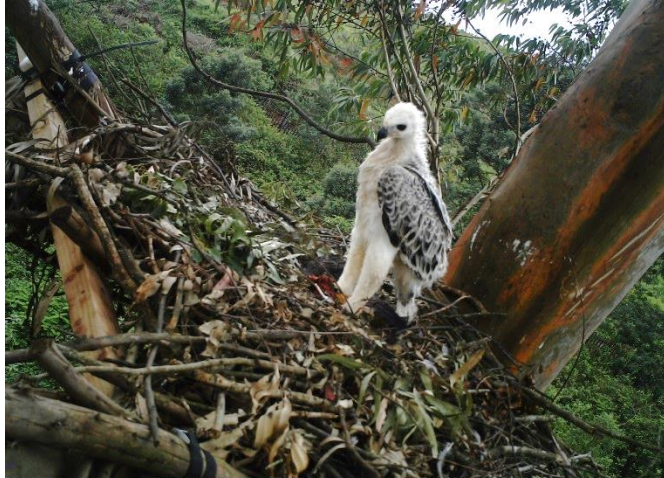

Ltl Acom VCCE ○ 080°F 027°C 13/12/2012 14:48:49

74

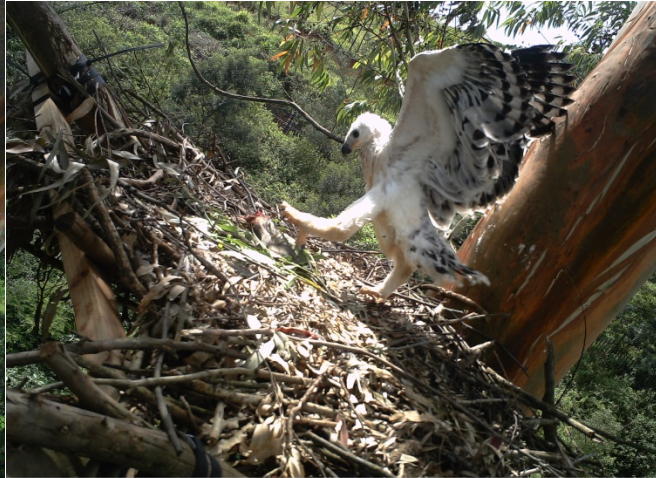

Ltl Acom VCCE ☐ 078°F 026°C 21/12/2012 09:15:11

79

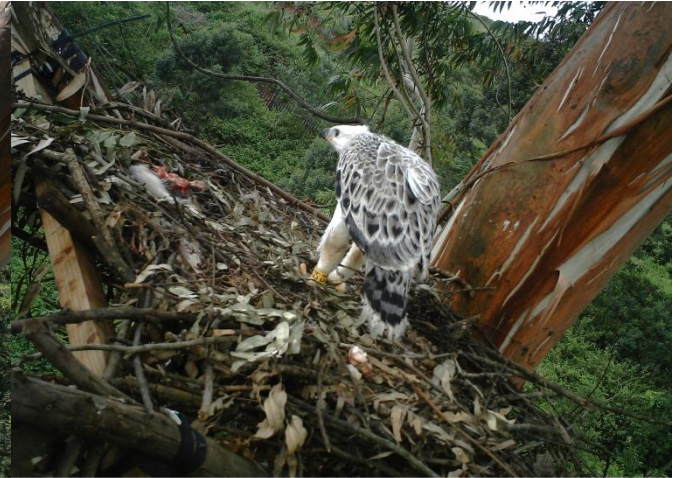

Ltl Acom VCCE ● 080°F 027°C 26/12/2012 13:28:36

Female C3  
71

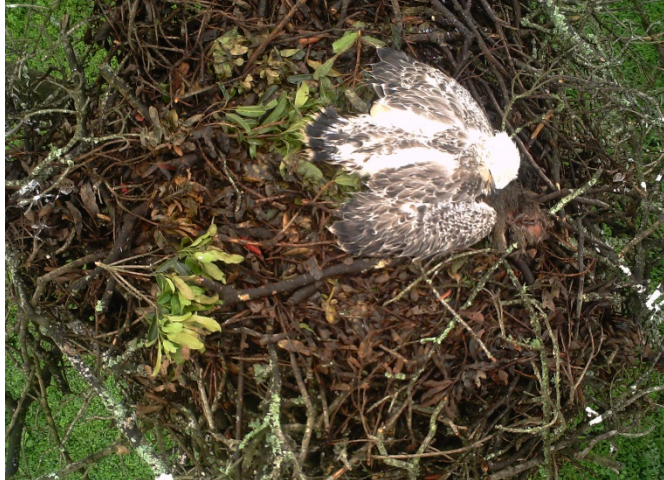

Ltl Acom ☐ 060°F 016°C 11/28/2013 10:55:10

77

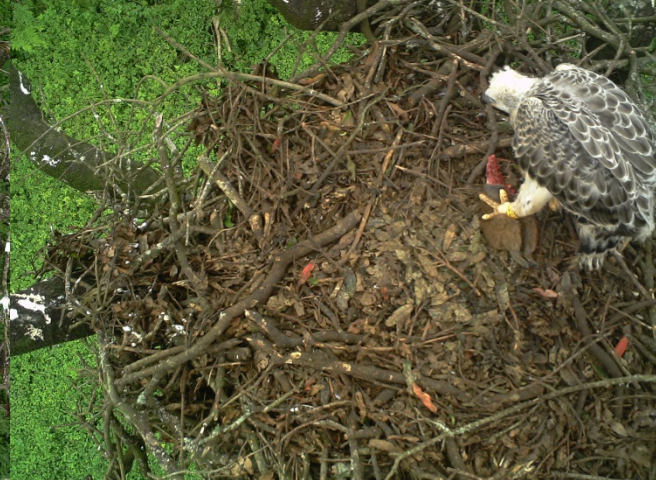

Ltl Acom ☐ 071°F 022°C 12/04/2013 13:35:13

83

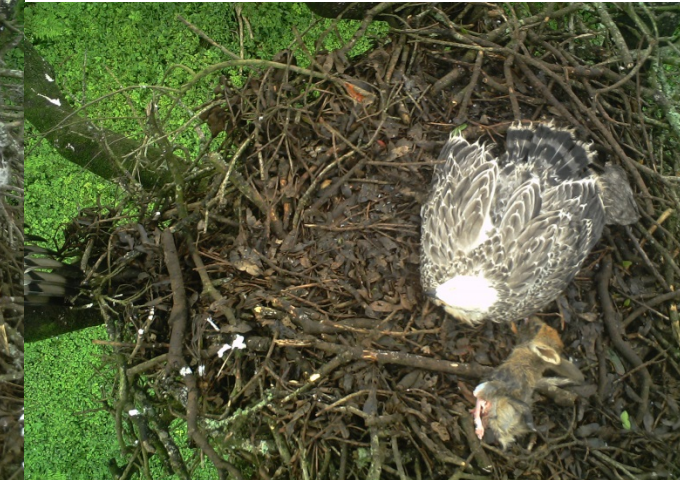

Ltl Acom ☐ 069°F 021°C 12/10/2013 11:52:14

Male E4  
83

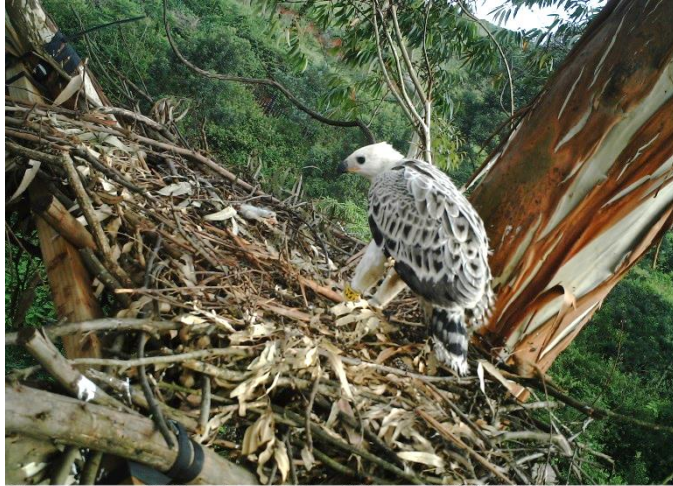

Ltl Acom VCCE 082°F 028°C 30/12/2012 17:05:50

91

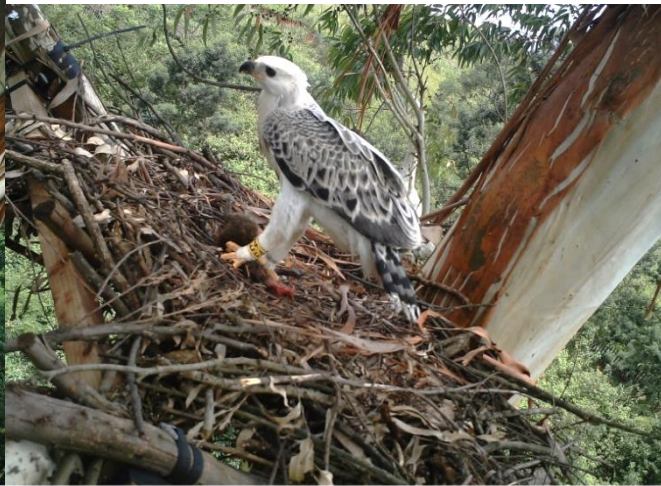

Ltl Acom VCCE 084°F 029°C 07/01/2013 12:38:54

101 (branching)

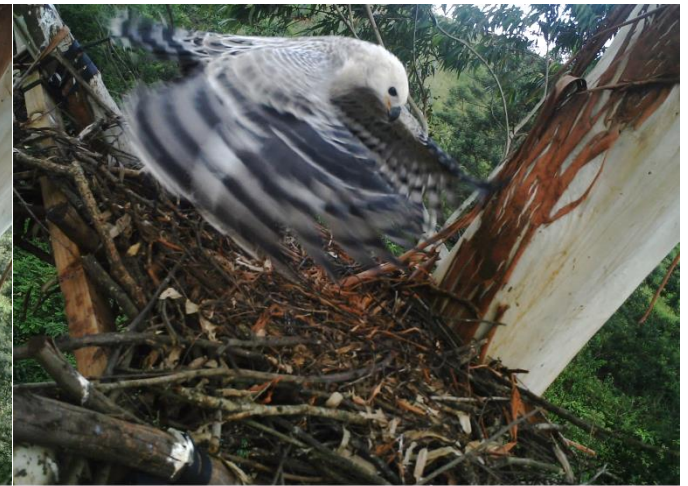

Ltl Acom VCCE 087°F 031°C 17/01/2013 14:19:48

Female C3  
86

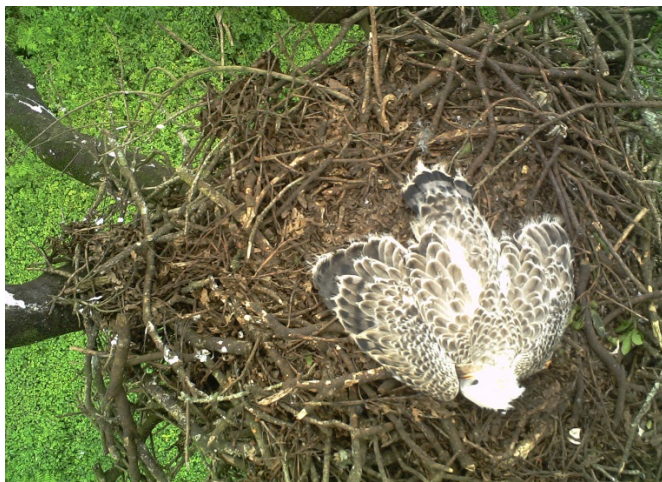

Ltl Acom 078°F 026°C 12/13/2013 11:24:43

94

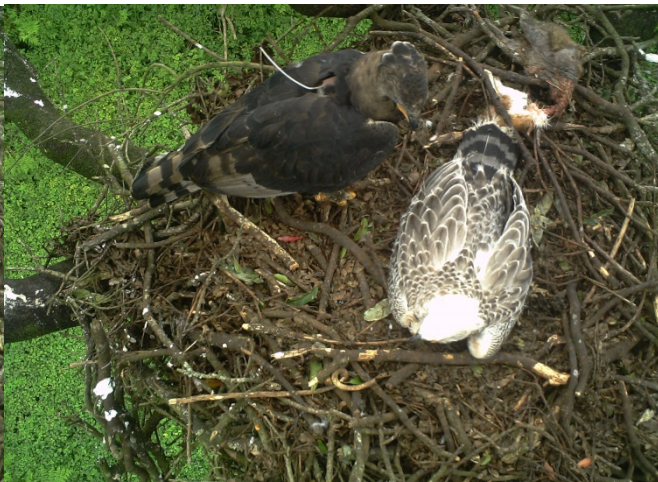

Ltl Acom 078°F 026°C 12/21/2013 16:42:32

105

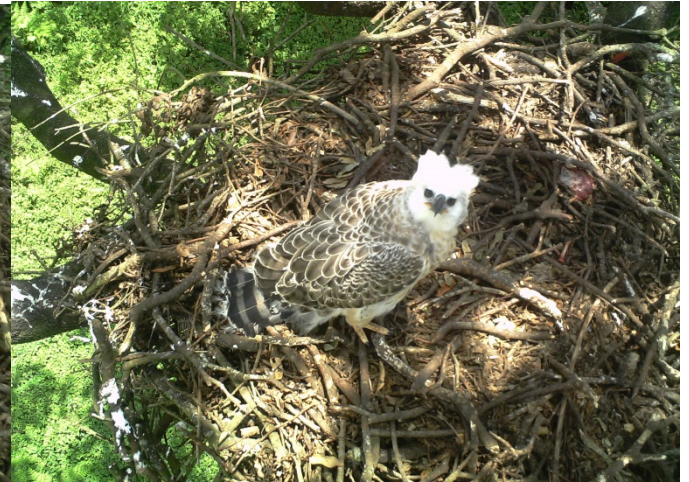

Ltl Acom 084°F 029°C 01/01/2014 11:45:17
